# Supplementary material
Source: PubMed Central journal article supplement (PMC2795709)

# Supplemental Fig 1

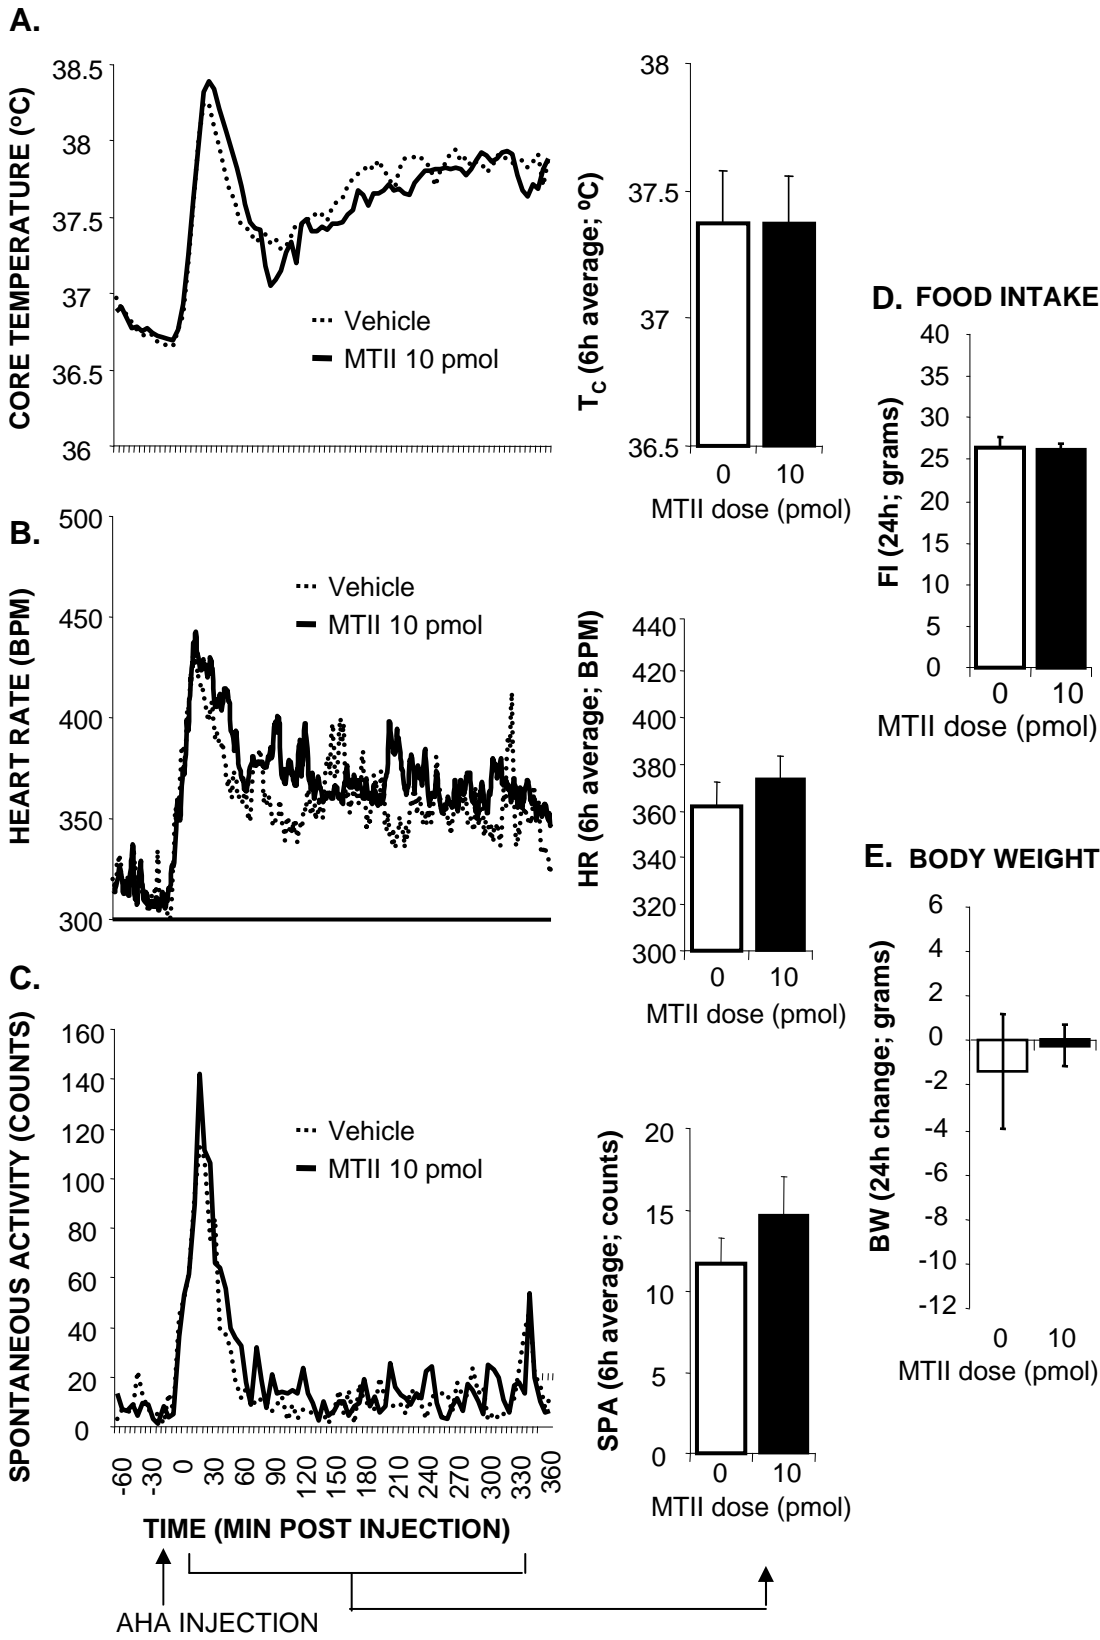

Supplement: en.2009-0804_1.pdf [file en.2009-0804_1.pdf]
